# Supplementary material
Source: Elsevier journal article supplement (https://discovery-pp.ucl.ac.uk/1477006/2/mmc1.pdf)
Supplement: mmc1 [file mmc1.pdf]

## **Supplementary data**

**Title: Development of mechano-responsive polymeric scaffolds using functional silica nano fillers for control cellular functions**

Griffin M,<sup>1</sup> Nayer L.<sup>1</sup>, Butler P.E.<sup>1,2</sup>, Palgrave R.G.<sup>3</sup>, Seifalian A.M., Kalaskar D. M.\*<sup>1</sup>

<sup>1</sup>*UCL Centre for Nanotechnology and Regenerative Medicine, Division of Surgery & Interventional Science, University College London, London, United Kingdom*

<sup>2</sup>*Royal Free London NHS Foundation Trust Hospital, London, United Kingdom*

<sup>3</sup>*Department of Chemistry, University College London, 20 Gordon Street, London, WC1H 0AJ.*

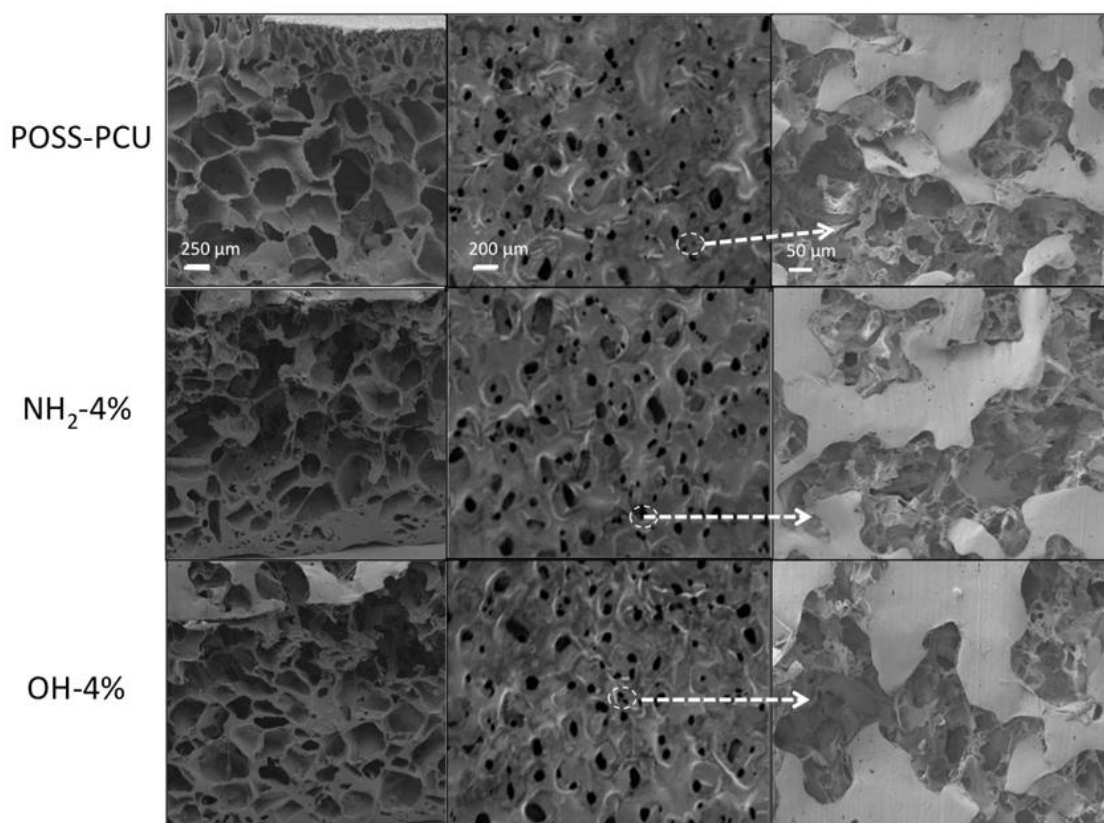

**Figure S1. Scanning electron microscopy images of the scaffolds after modification with the fumed silica nanoparticles and fumed silica nanoparticles functionalized with amine nanoparticles (n=3). Key; NH<sub>2</sub>: POSS-PCU modified with amine nanoparticles OH: POSS-PCU modified with fumed silica nanoparticles POSS-PCU: Unmodified scaffolds.**

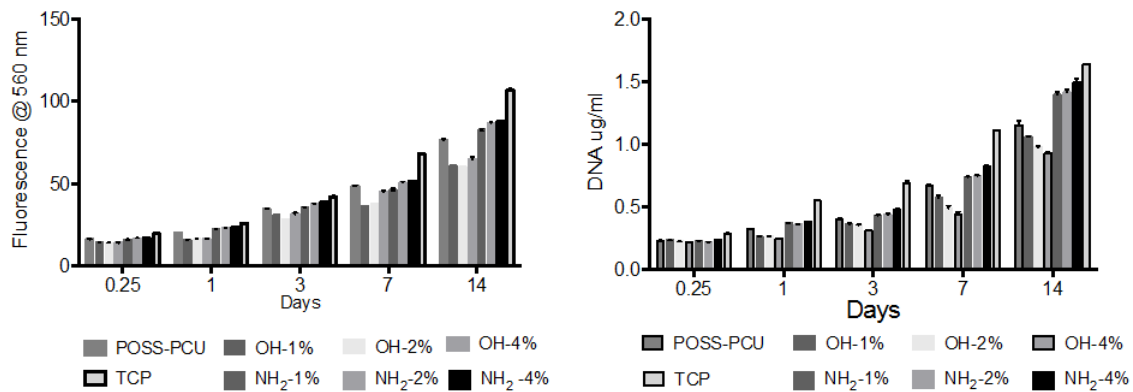

**Figure S2. Human dermal fibroblast behaviour over 14 days on the modified scaffolds with increasing amounts of silica nanoparticles. (A) Cell viability using alamar blue assay (n = 6). (B) Total DNA assay (n = 6). HDFs showed a similar cell viability and growth on the modified scaffolds over a 14 day period. Key; NH<sub>2</sub>: POSS-PCU modified with amine nanoparticles OH: POSS-PCU modified with fumed silica nanoparticles POSS-PCU: Unmodified scaffolds.**

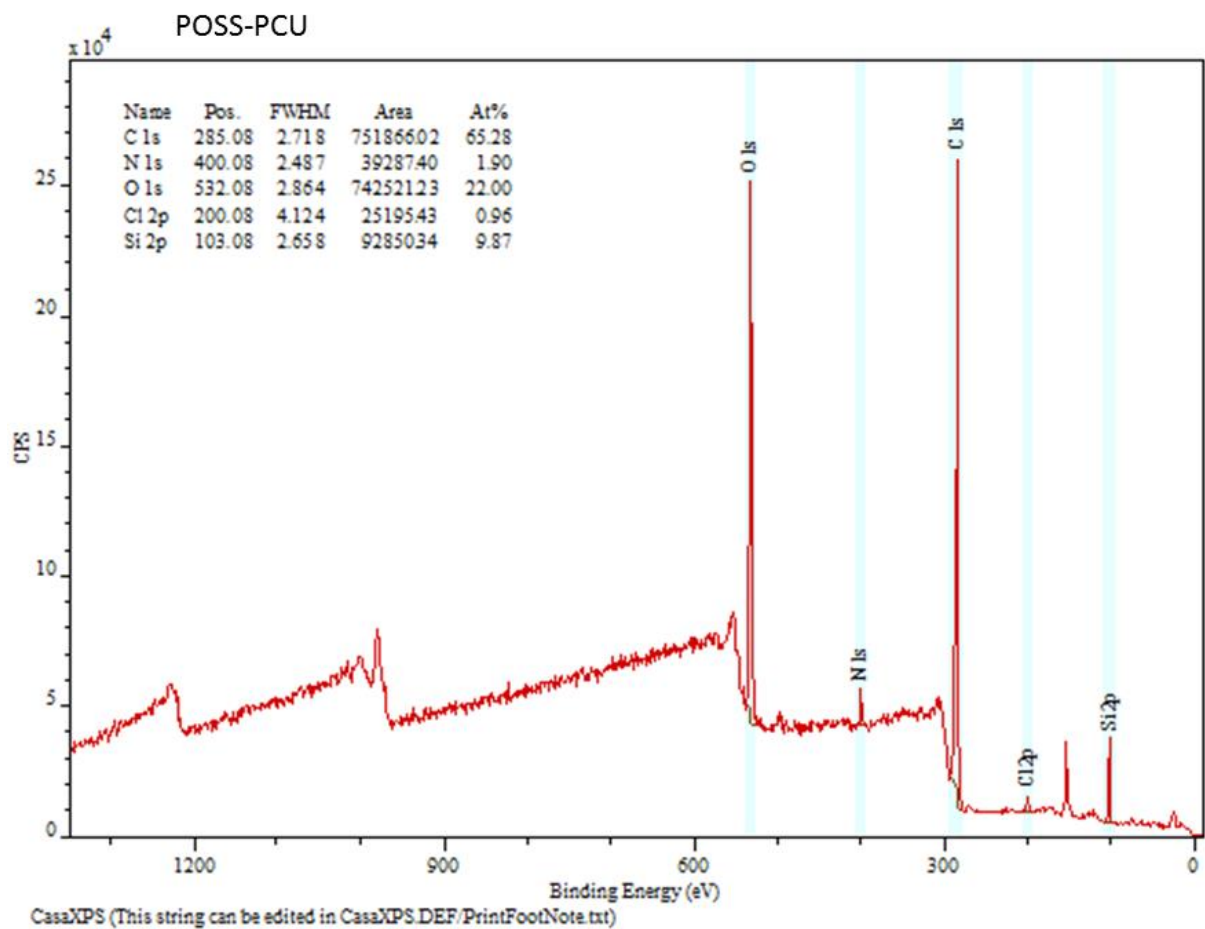

Figure S3. X-ray photoelectron spectroscopy (XPS) survey spectra of POSS-PCU.

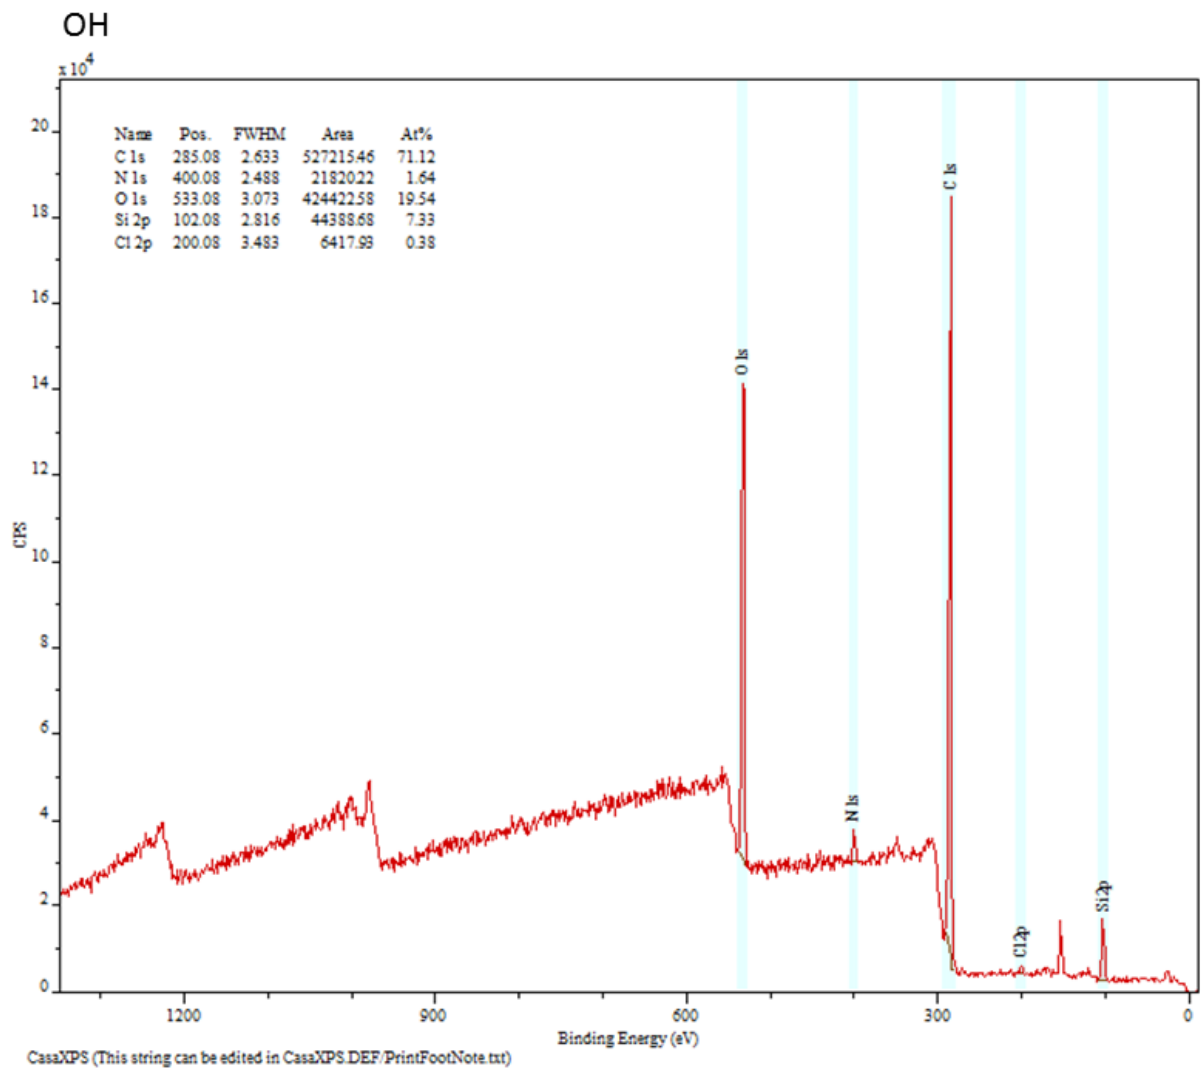

**Figure S4. X-ray photoelectron spectroscopy (XPS) survey spectra of POSS-PCU modified with fumed silica nanoparticles .**

NH<sub>2</sub>

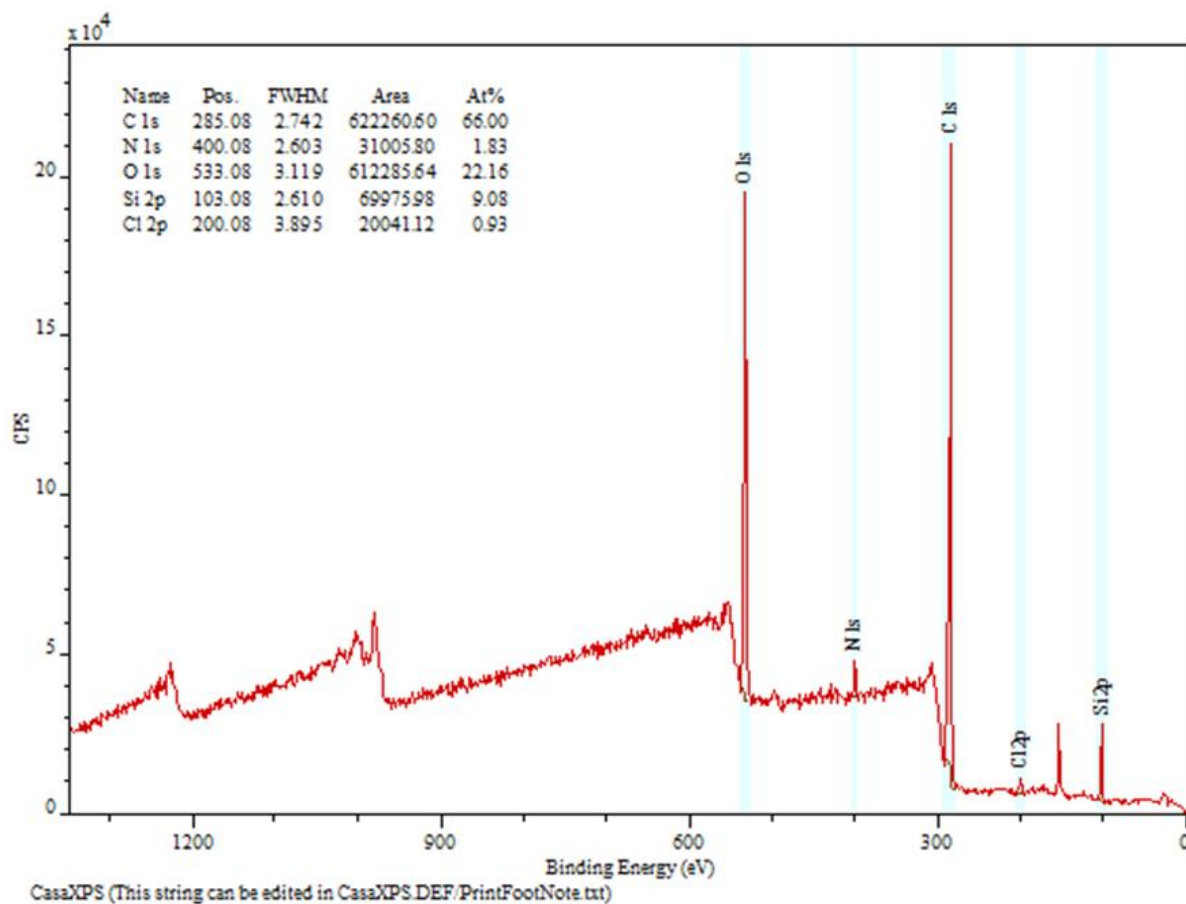

**Figure S5. X-ray photoelectron spectroscopy (XPS) survey spectra of POSS-PCU modified with fumed silica nanoparticles functionalized with amine groups (NH<sub>2</sub>).**

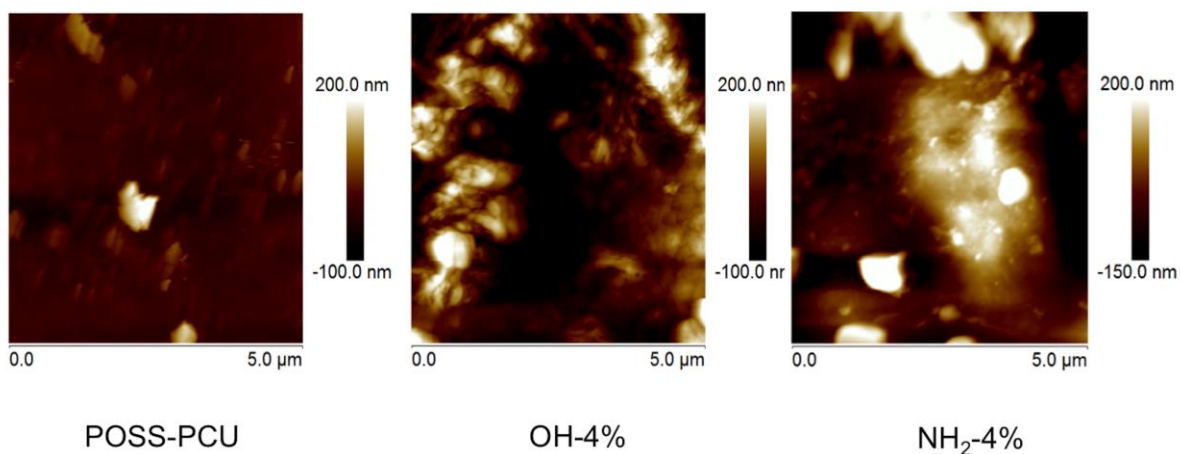

**Figure S6 Atomic Force Microscopy Images of the POSS-PCU scaffold and POSS-PCU modified with 4% fumed silica nanoparticles (OH) and 4% fumed silica nanoparticles modified with amine (NH<sub>2</sub>).**

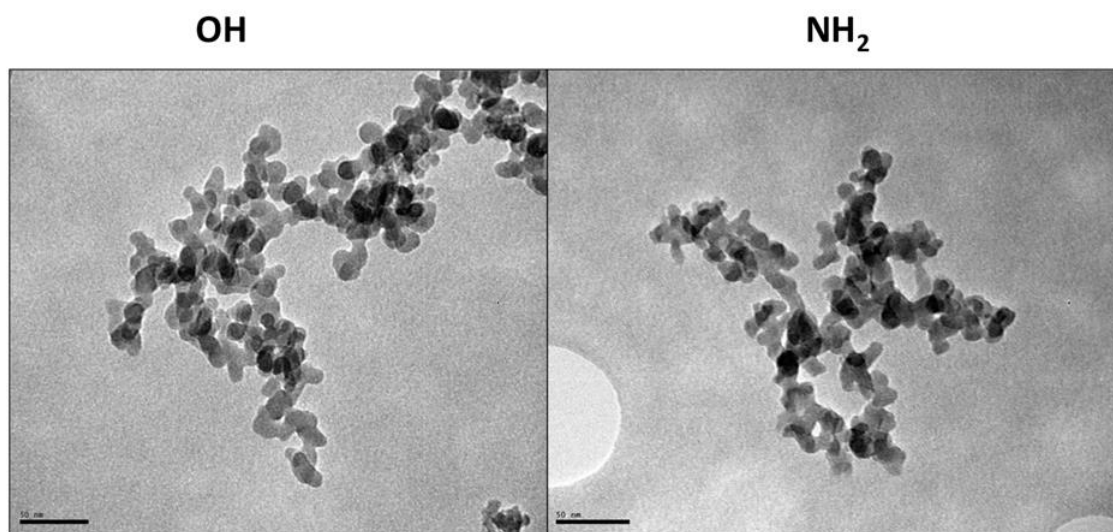

**Figure S7. Transmission Electron Microscopy (TEM) of the fumed silica nanoparticles (OH) and fumed silica nanoparticles modified with amine (NH<sub>2</sub>).**
